# Supplementary material for: Molecular and Pigment Analyses Provide Comparative Results When Reconstructing Historic Cyanobacterial Abundances from Lake Sediment Cores
Source: MDPI journal article supplement (doi:10.3390/microorganisms10020279), 2022-01-25
Supplement: s1 [file s1]

## Supplementary Material

Table S1: Lake details. All lakes were cored at their deepest point (depocenter).

|                                     | <i>Lake Nganoke</i> | <i>Lake Okataina</i>   | <i>Lake Pounui</i> | <i>Lake Rototoa</i>    |
|-------------------------------------|---------------------|------------------------|--------------------|------------------------|
| <i>Latitude</i>                     | 41° 21' 19" S       | 38° 6' 36" S           | 41° 20' 39" S      | 36° 30' 43" S          |
| <i>Longitude</i>                    | 175° 11' 13" E      | 176° 25' 17" E         | 175° 6' 48" E      | 174° 14' 19" E         |
| <i>Max depth (m)</i>                | 2                   | 78                     | 9                  | 26.1                   |
| <i>Current water quality</i>        | Eutrophic           | Oligotrophic           | Eutrophic          | Oligotrophic           |
| <i>Recent cyanobacterial blooms</i> | Yes                 | No                     | Yes                | No                     |
| <i>Main land type in catchment</i>  | Pasture             | Native / Pine forestry | Native             | Pine forestry / Native |

Table S2: Rototoa age model. Some rapidly deposited layers were observed between 24.7-28.1 cm and 44.3-53.9 cm, therefore theses depths were removed from the age model.

| <i>Depth (cm)</i> | <i>Year (AD)</i> | <i>sigma</i> | <i>median</i> | <i>sed</i> | <i>from_95_4</i> | <i>to_95_4</i> |
|-------------------|------------------|--------------|---------------|------------|------------------|----------------|
| 0                 | 2018             | 0            | 2018          | 0.59       | 2017             | 2018           |
| 1                 | 2016             | 0            | 2016          | 0.352      | 2016             | 2016           |
| 2                 | 2012             | 0            | 2012          | 0.25       | 2012             | 2012           |
| 3                 | 2008             | 0            | 2008          | 0.223      | 2007             | 2009           |
| 4                 | 2003             | 0            | 2003          | 0.221      | 2002             | 2004           |
| 5                 | 1999             | 1            | 1999          | 0.222      | 1998             | 2000           |
| 6                 | 1994             | 1            | 1994          | 0.203      | 1993             | 1995           |
| 7                 | 1989             | 1            | 1989          | 0.216      | 1988             | 1991           |
| 8                 | 1985             | 1            | 1985          | 0.2        | 1983             | 1986           |
| 9                 | 1979             | 1            | 1979          | 0.186      | 1977             | 1981           |
| 10                | 1974             | 1            | 1974          | 0.193      | 1972             | 1976           |
| 11                | 1969             | 1            | 1969          | 0.18       | 1967             | 1971           |
| 12                | 1963             | 1            | 1963          | 0.165      | 1960             | 1965           |
| 13                | 1957             | 1            | 1957          | 0.15       | 1954             | 1960           |
| 14                | 1950             | 2            | 1950          | 0.151      | 1947             | 1953           |
| 15                | 1944             | 2            | 1943          | 0.152      | 1940             | 1947           |
| 16                | 1936             | 2            | 1936          | 0.131      | 1933             | 1940           |
| 17                | 1928             | 2            | 1928          | 0.122      | 1924             | 1932           |
| 18                | 1920             | 2            | 1920          | 0.14       | 1916             | 1924           |
| 19                | 1914             | 2            | 1914          | 0.157      | 1910             | 1918           |
| 20                | 1907             | 3            | 1908          | 0.152      | 1899             | 1916           |
| 21                | 1901             | 4            | 1901          | 0.152      | 1893             | 1910           |
| 22                | 1894             | 4            | 1894          | 0.152      | 1885             | 1903           |
| 23                | 1888             | 3            | 1888          | 0.171      | 1878             | 1893           |
| 24                | 1882             | 4            | 1883          | 0.196      | 1872             | 1892           |
| 29                | 1874             | 5            | 1874          | 0.195      | 1863             | 1885           |
| 30                | 1869             | 5            | 1869          | 0.195      | 1857             | 1881           |

|    |      |    |      |       |      |      |
|----|------|----|------|-------|------|------|
| 31 | 1864 | 6  | 1864 | 0.195 | 1851 | 1877 |
| 32 | 1859 | 6  | 1859 | 0.195 | 1846 | 1871 |
| 33 | 1854 | 6  | 1854 | 0.195 | 1840 | 1867 |
| 34 | 1849 | 7  | 1849 | 0.195 | 1834 | 1863 |
| 35 | 1844 | 7  | 1844 | 0.196 | 1829 | 1859 |
| 36 | 1838 | 7  | 1838 | 0.195 | 1823 | 1854 |
| 37 | 1833 | 8  | 1833 | 0.195 | 1817 | 1850 |
| 38 | 1828 | 8  | 1828 | 0.195 | 1812 | 1844 |
| 39 | 1823 | 8  | 1823 | 0.195 | 1806 | 1840 |
| 40 | 1818 | 8  | 1818 | 0.195 | 1801 | 1836 |
| 41 | 1813 | 9  | 1813 | 0.196 | 1795 | 1831 |
| 42 | 1808 | 9  | 1808 | 0.196 | 1789 | 1827 |
| 43 | 1803 | 9  | 1802 | 0.196 | 1784 | 1822 |
| 44 | 1797 | 9  | 1797 | 0.196 | 1779 | 1818 |
| 54 | 1795 | 9  | 1794 | 0.195 | 1776 | 1816 |
| 55 | 1790 | 9  | 1790 | 0.195 | 1772 | 1810 |
| 56 | 1785 | 10 | 1784 | 0.196 | 1765 | 1806 |
| 57 | 1780 | 10 | 1779 | 0.196 | 1760 | 1801 |
| 58 | 1774 | 10 | 1774 | 0.196 | 1754 | 1797 |
| 59 | 1769 | 10 | 1769 | 0.196 | 1749 | 1791 |
| 60 | 1764 | 10 | 1763 | 0.196 | 1744 | 1787 |
| 61 | 1759 | 11 | 1758 | 0.196 | 1739 | 1782 |
| 62 | 1754 | 11 | 1753 | 0.196 | 1733 | 1777 |
| 63 | 1749 | 11 | 1748 | 0.196 | 1728 | 1773 |
| 64 | 1744 | 11 | 1743 | 0.196 | 1723 | 1768 |
| 65 | 1739 | 11 | 1737 | 0.196 | 1718 | 1763 |
| 66 | 1734 | 11 | 1732 | 0.196 | 1713 | 1758 |
| 67 | 1729 | 11 | 1727 | 0.196 | 1707 | 1754 |
| 68 | 1723 | 12 | 1722 | 0.196 | 1702 | 1748 |
| 69 | 1718 | 12 | 1716 | 0.196 | 1697 | 1745 |
| 70 | 1713 | 12 | 1712 | 0.196 | 1693 | 1738 |
| 71 | 1708 | 12 | 1706 | 0.196 | 1687 | 1735 |
| 72 | 1703 | 12 | 1701 | 0.196 | 1683 | 1729 |
| 73 | 1698 | 12 | 1696 | 0.196 | 1676 | 1724 |
| 74 | 1693 | 12 | 1690 | 0.196 | 1673 | 1721 |
| 75 | 1688 | 12 | 1685 | 0.196 | 1667 | 1714 |

Table S3: Mastermix and cycling conditions for the 107F and 377R\_mod primer set.

| Primer set           | Master Mix (for one sample)   | Cycling conditions                     |
|----------------------|-------------------------------|----------------------------------------|
| 107F and<br>377R_mod |                               | Initial denaturation: 95°C - 5 minutes |
|                      | 10 µL Evagreen (2x)           |                                        |
|                      | 7.6 µL DNA-free water         | 50 cycles:                             |
|                      | 0.2 µL Forward primer (10 µM) | Denaturation: 95°C - 30 seconds        |
|                      | 0.2 µL Reverse primer (10 µM) | Annealing: 55°C - 1 minute             |
|                      | 4 µL template DNA             |                                        |
|                      |                               | 4°C - 5 minutes                        |
|                      |                               | 90°C - 5 minutes                       |

## 16S cyanobacteria.

|         |                                    |                                                       |
|---------|------------------------------------|-------------------------------------------------------|
| Forward | 108F                               | 5'- ACGGGTGAGTAACRCGTR <b>A</b> -3'                   |
|         | 107F                               | 5'- <b>G</b> ACGGGTGAGTAACRCGTR <b>R</b> <b>G</b> -3' |
|         | <i>Aphanizomenon flos-aquae</i>    | 5'- <b>G</b> ACGGGTGAGTAACGCGTAA <b>G</b> -3'         |
|         | <i>Calothrix sp.</i>               | 5'- <b>G</b> ACGGGTGAGTAACGCGGTGA <b>G</b> -3'        |
|         | <i>Cyanobium gracile</i>           | 5'- <b>G</b> ACGGGTGAGTAACGCGGTG <b>G</b> -3'         |
|         | <i>Dolichospermum lemmermannii</i> | 5'- <b>G</b> ACGGGTGAGTAACGCGTAA <b>G</b> -3'         |
|         | <i>Microcoleus vaginatus</i>       | 5'- <b>G</b> ACGGGTGAGTAACGCGGTGA <b>G</b> -3'        |
|         | <i>Nostoc punctiformes</i>         | 5'- <b>G</b> ACGGGTGAGTAACGCGGTGA <b>G</b> -3'        |
|         | <i>Oscillatoria sp.</i>            | 5'- <b>G</b> ACGGGTGAGTAACGCGGTGA <b>G</b> -3'        |
|         | <i>Phormidium autumnale</i>        | 5'- <b>G</b> ACGGGTGAGTAACGCGGTGA <b>G</b> -3'        |
| Reverse | 377R                               | 5'- GGGGAATTTTCCGC <b>A</b> TGG -3'                   |
|         | 377R_mod                           | 5'- GGGGAATTTTCCGC <b>A</b> TGG -3'                   |
|         | <i>Aphanizomenon flos-aquae</i>    | 5'- GGGGAATTTTCCGC <b>A</b> TGG -3'                   |
|         | <i>Calothrix sp.</i>               | 5'- GGGGAATTTTCCGC <b>A</b> TGG -3'                   |
|         | <i>Cyanobium gracile</i>           | 5'- GGGGAATTTTCCGC <b>A</b> TGG -3'                   |
|         | <i>Dolichospermum lemmermannii</i> | 5'- GGGGAATTTTCCGC <b>A</b> TGG -3'                   |
|         | <i>Microcoleus vaginatus</i>       | 5'- GGGGAATTTTCCGC <b>A</b> TGG -3'                   |
|         | <i>Nostoc punctiformes</i>         | 5'- GGGGAATTTTCCGC <b>A</b> TGG -3'                   |
|         | <i>Oscillatoria sp.</i>            | 5'- GGGGAATTTTCCGC <b>A</b> TGG -3'                   |
|         | <i>Phormidium autumnale</i>        | 5'- GGGGAATTTTCCGC <b>A</b> TGG -3'                   |
|         | <i>Synechococcus elongatus</i>     | 5'- GGGGAATTTTCCGC <b>A</b> TGG -3'                   |
|         | <i>Tychenoma bourrelyi</i>         | 5'- GGGGAATTTTCCGC <b>A</b> TGG -3'                   |

Figure S1: Partial nucleotide alignment of the cyanobacterial 16S rRNA gene with the two primer sets. The primer CYAN107F was improved from CYAN108F and CYAN377R\_mod was improved from CYAN377R, both from Rinta-Kanto et al. (2005). Nucleotides highlighted in yellow show which nucleotides from the CYAN108F/CYAN377R primer set were modified in the 107R/CYAN377R\_mod set. Nucleotides in red show the nucleotides added to the new forward primer.

Table S4: List and details of the new chloroplasts (plastids) detected by the new primer set compared to the original set. Run in-silico on the SILVA database, with 1 bp mismatch.

| <i>Scientific Name</i>                    | <i>Common name</i>               | <i>Found in</i>                                                    |
|-------------------------------------------|----------------------------------|--------------------------------------------------------------------|
| <i>Nephroselmis olivacea</i>              | green algae                      | freshwater                                                         |
| <i>Zygnema circumcarinatum</i>            | charophycean alga                | freshwater (not NZ)                                                |
| <i>Pelargonium x hortorum</i>             | zonal geranium                   | global                                                             |
| <i>Austrotaxus spicata</i>                | New Caledonia yew / southern yew | New Caledonia                                                      |
| <i>uncultured bacterium ARCTIC13_E_12</i> |                                  |                                                                    |
| <i>uncultured bacterium ARCTIC24_F_09</i> |                                  |                                                                    |
| <i>Micromonas commoda</i>                 | green algae                      | marine environment                                                 |
| <i>Bathycoccus prasinos</i>               | marine green alga                | marine environment                                                 |
| <i>Cephalotaxus hainanensis</i>           | Hainan plum-yew                  | Hainan peninsula (China)                                           |
| <i>Ecdeiocolea monostachya</i>            | tufted perennial                 | Western Australia                                                  |
| <i>Passiflora ciliata</i>                 | passionflower                    | natural range Mexico to North Colombia, South Florida to Caribbean |
| <i>Wisteria floribunda</i>                | Japanese wisteria                | Japan                                                              |
| <i>Aquilaria sinensis</i>                 | Aquilaria tree                   | China                                                              |
| <i>Hafniomonas laevis</i>                 | green algae                      | freshwater                                                         |
| <i>Cylindrocystis brebissonii</i>         | green algae                      | freshwater                                                         |
| <i>Thorea hispida</i>                     | red algae                        | British Isles                                                      |
| <i>Otohimella japonica</i>                | red algae                        | Japan (freshwater)                                                 |
| <i>Oryza rufipogon</i>                    | wild rice / red rice             | East, South, Southeast Asia                                        |
| <i>Dermonema virens</i>                   | red algae                        | marine environment                                                 |
| <i>Izziella formosana</i>                 | red algae                        | marine environment                                                 |
| <i>Liagoropsis maxima</i>                 | red algae                        | marine environment                                                 |
| <i>Trichogloeopsis pedicellata</i>        | red algae                        | marine environment                                                 |
| <i>Dichanthelium oligosanthos</i>         | Heller's rosette grass           | North America                                                      |
| <i>Polysiphonia schneideri</i>            | red algae                        | marine environment                                                 |
| <i>Hemitomes congestum</i>                | Gnome plant                      | Western United States                                              |
| <i>Mantoniella squamata</i>               | green algae                      | marine environment                                                 |

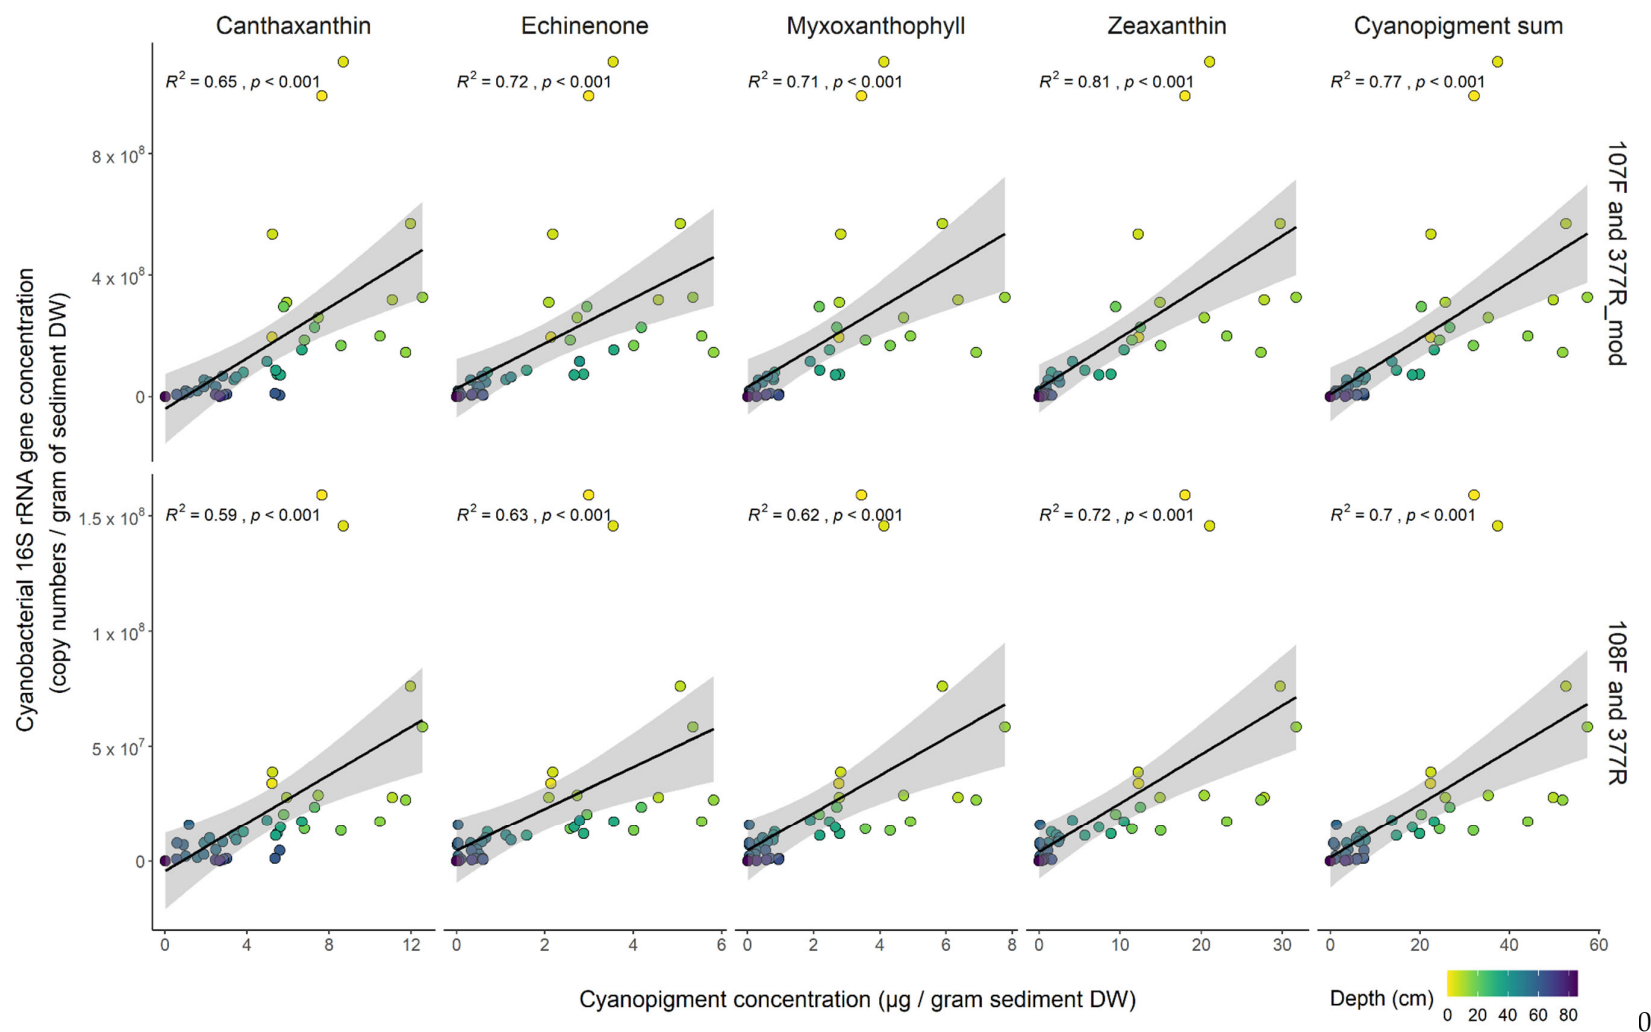

Figure S2: Correlations between the new and original primer sets (107F / 377R\_mod and 108F / 377R, respectively) with individual and summed cyanopigments in Lake Nganoke. Spearman's correlations are displayed for each plot, DW stands for dry weight of sediment.

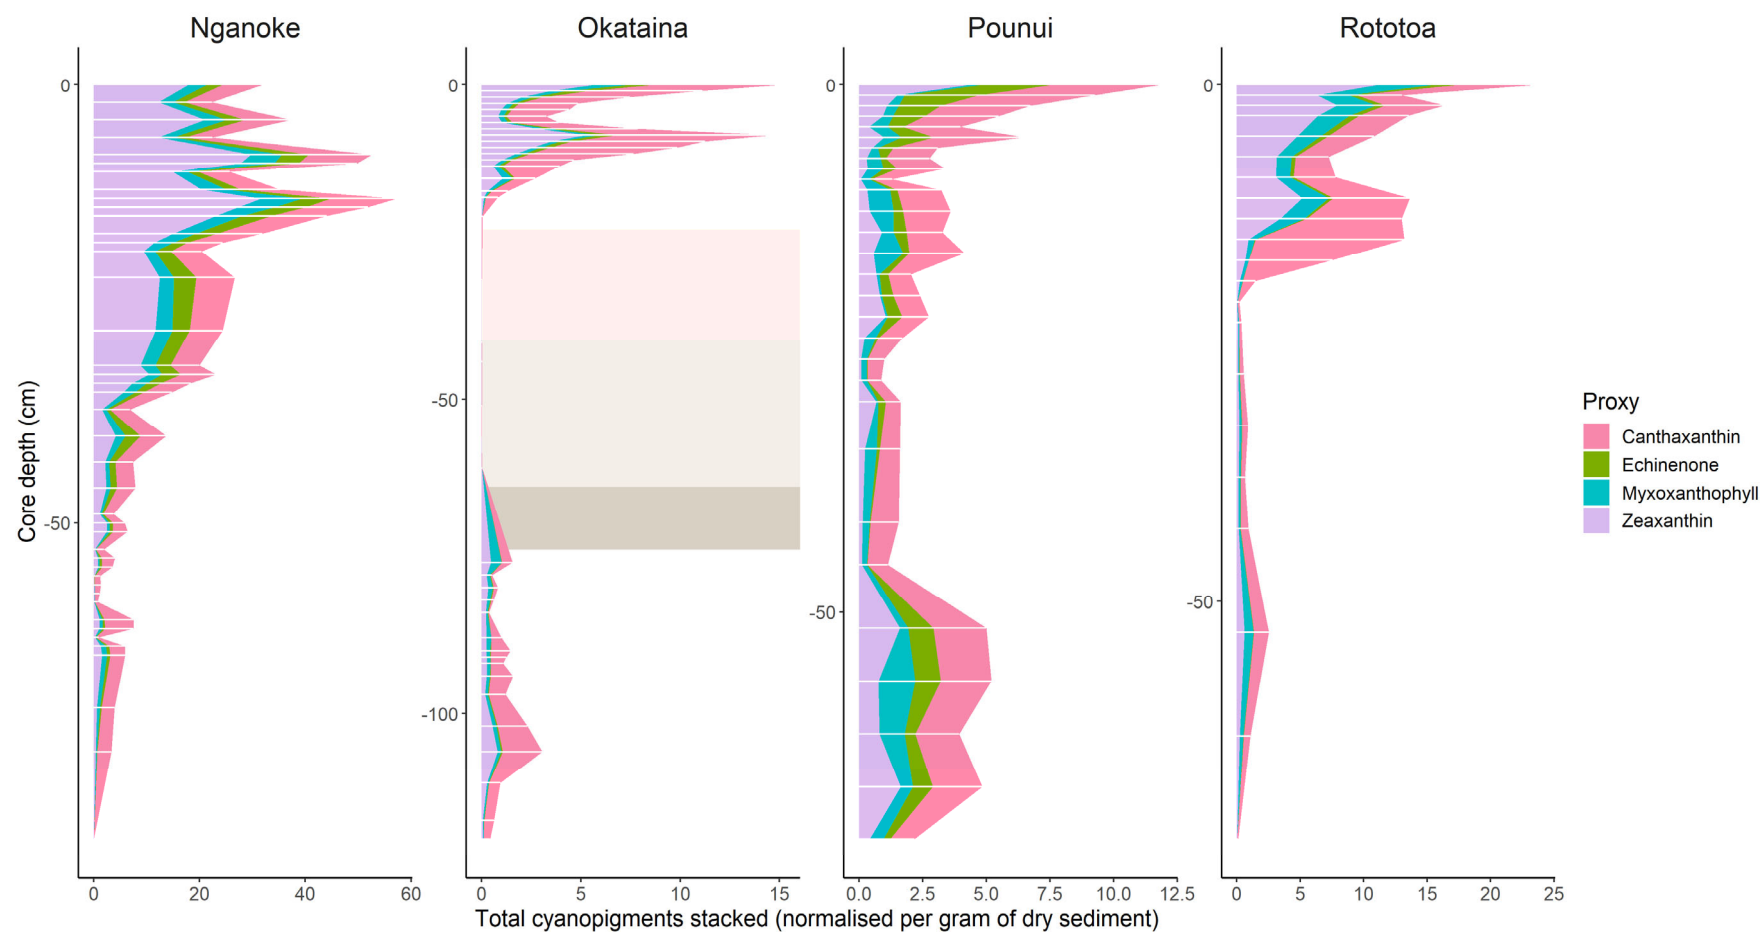

Figure S3: Stacked view of the individual cyanopigments to visualise the contribution of each cyanopigment to total cyanopigment. White horizontal lines indicate sub-samples depths for each lake sediment core.

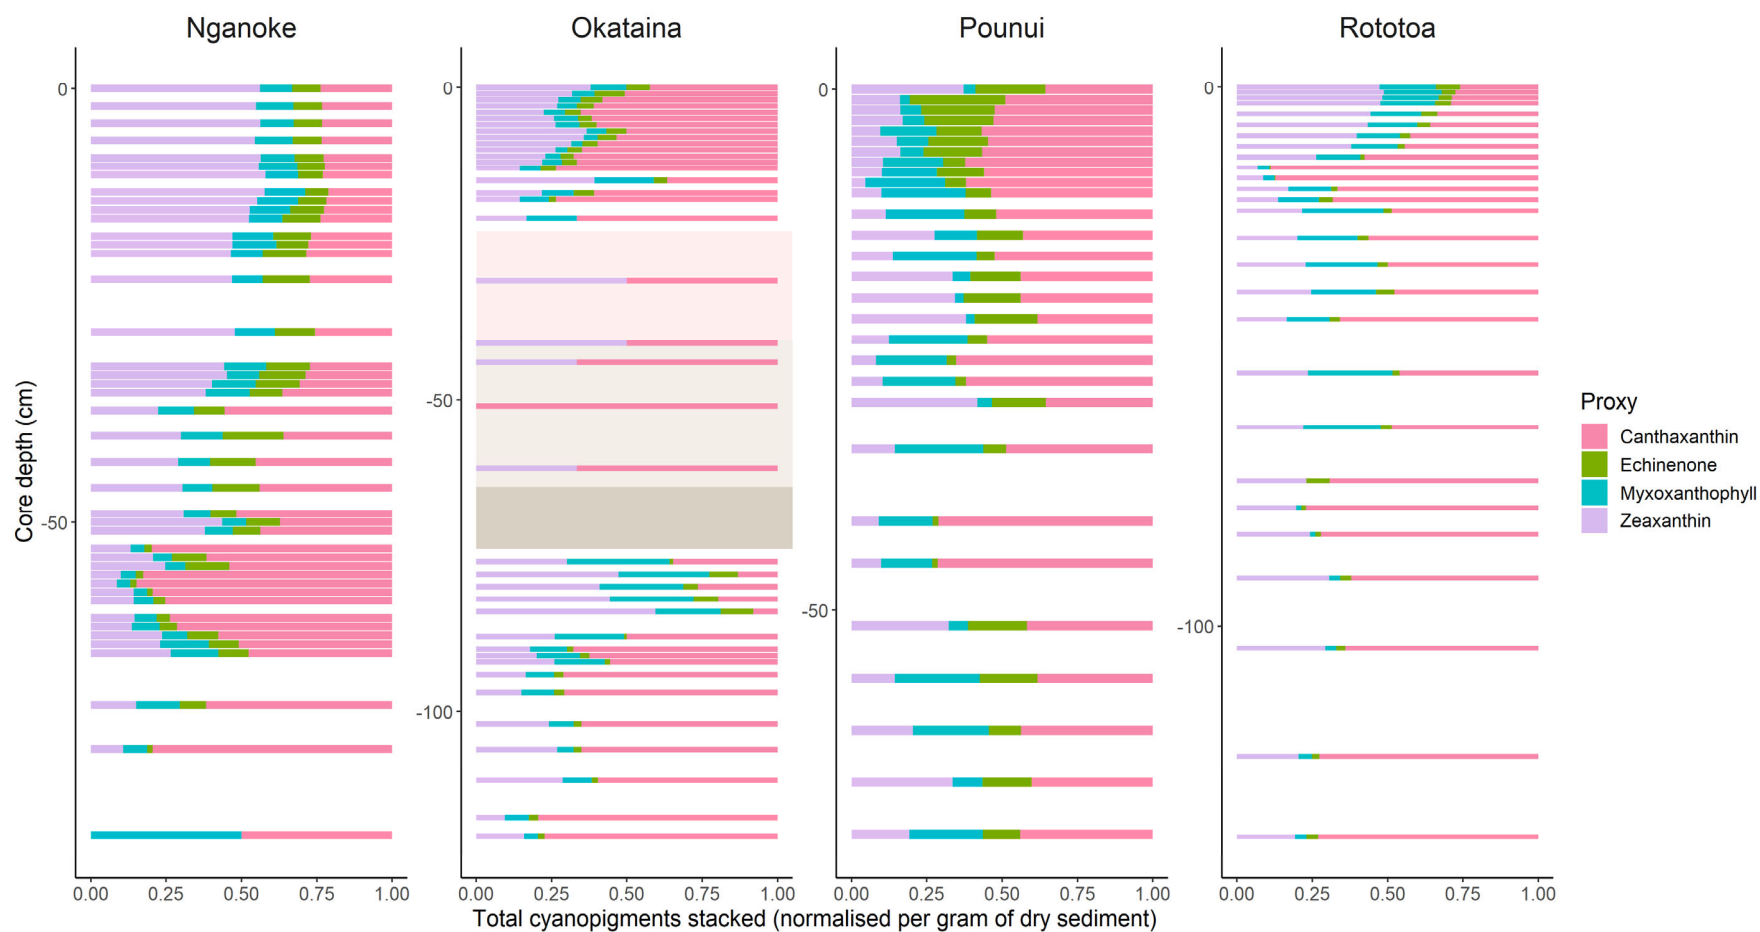

Figure S4: Percent stacked barplots showing the relative contribution of individual pigments to total cyanopigments.
